# Supplementary material
Source: MDPI journal article supplement (https://www.mdpi.com/2673-527X/1/2/14)
Supplement: s1 [file s1]

## CHEST DRAIN OBSERVATION CHART

NAME

HOSPITAL NO.

DOB

**Date and time of insertion:**

**Ward:**

**Consultant:**

### TYPE OF DRAIN

**Seldinger 12F 18F**

**Wide bore** 20F 22F 24F 26F 28F

**Indication:** pleural effusion      pneumothorax      empyema      other.....

OBSERVATION POST INSERTION

- Every 15 mins for 1<sup>st</sup> hour
- Every hour for the next 3 hours and every 4 hours until removal
- Observe site for signs of infection/disconnection/air leak and/or displacement
- Ensure drain bottle positioned below level of chest
- Maximum 1000 mls in 1<sup>st</sup> hour
- Record amount and type of drainage
- Ensure patient is comfortable and has adequate analgesia

\*Drainage type C = Clear P = Purulent B = Blood S = Serous

[illegible]

[illegible]
